# Supplementary material
Source: publisher figshare collection journal article supplement (https://tandf.figshare.com/ndownloader/files/20154518)
Supplement: Supplementary file 1 [file 20154518]

**Supplemental Data Table.** Provider impressions of survey non-responders and responders.

| Provider Impression      | Not Contacted* |               | Contacted but not surveyed** |               | Surveyed*** |               |
|--------------------------|----------------|---------------|------------------------------|---------------|-------------|---------------|
| Trauma Injury            | 35             | 32.4%         | 5                            | 27.8%         | 9           | 27.3%         |
| Unknown Medical          | 21             | 19.4%         | 0                            | 0.0%          | 2           | 6.1%          |
| Psychiatric Emergency    | 9              | 8.3%          | 0                            | 0.0%          | 2           | 6.1%          |
| No Medical Problem       | 10             | 9.3%          | 0                            | 0.0%          | 1           | 3.0%          |
| Anxiety                  | 6              | 5.6%          | 0                            | 0.0%          | 2           | 6.1%          |
| Back Pain (No Trauma)    | 4              | 3.7%          | 2                            | 11.1%         | 0           | 0.0%          |
| Flu Symptoms             | 4              | 3.7%          | 2                            | 11.1%         | 2           | 6.1%          |
| Asthma Symptoms          | 3              | 2.8%          | 2                            | 11.1%         | 1           | 3.0%          |
| Dyspnea-SOB              | 1              | 0.9%          | 2                            | 11.1%         | 2           | 6.1%          |
| Eye Symptoms (no trauma) | 1              | 0.9%          | 1                            | 5.6%          | 1           | 3.0%          |
| Nausea                   | 2              | 1.9%          | 0                            | 0.0%          | 1           | 3.0%          |
| Headache (no trauma)     | 1              | 0.9%          | 1                            | 5.6%          | 1           | 3.0%          |
| Sore Throat              | 2              | 1.9%          | 0                            | 0.0%          | 1           | 3.0%          |
| Seizure                  | 0              | 0.0%          | 0                            | 0.0%          | 1           | 3.0%          |
| Syncope/Fainting         | 0              | 0.0%          | 0                            | 0.0%          | 1           | 3.0%          |
| Behavioral Disorder      | 1              | 0.9%          | 0                            | 0.0%          | 0           | 0.0%          |
| Migraine                 | 1              | 0.9%          | 0                            | 0.0%          | 1           | 3.0%          |
| Nose Bleed               | 1              | 0.9%          | 0                            | 0.0%          | 1           | 3.0%          |
| Dizziness                | 1              | 0.9%          | 1                            | 5.6%          | 0           | 0.0%          |
| Weakness                 | 1              | 0.9%          | 1                            | 5.6%          | 0           | 0.0%          |
| Abdominal Pain           | 1              | 0.9%          | 0                            | 0.0%          | 0           | 0.0%          |
| Poisoning                | 0              | 0.0%          | 1                            | 5.6%          | 1           | 3.0%          |
| Chest Pain               | 0              | 0.0%          | 0                            | 0.0%          | 1           | 3.0%          |
| Pneumonia Symptoms       | 0              | 0.0%          | 0                            | 0.0%          | 1           | 3.0%          |
| Vomiting                 | 0              | 0.0%          | 0                            | 0.0%          | 1           | 3.0%          |
| Diabetic Symptoms        | 1              | 0.9%          | 0                            | 0.0%          | 0           | 0.0%          |
| Elevated Temp/Fever      | 1              | 0.9%          | 0                            | 0.0%          | 0           | 0.0%          |
| Urinary Bleeding         | 1              | 0.9%          | 0                            | 0.0%          | 0           | 0.0%          |
| Pain - Medical           | 0              | 0.0%          | 0                            | 0.0%          | 0           | 0.0%          |
| <b>Total</b>             | <b>108</b>     | <b>100.0%</b> | <b>18</b>                    | <b>100.0%</b> | <b>33</b>   | <b>100.0%</b> |

Footnotes:

\* “Not contacted” refers to the 108 patients who were treated and released and either did not provide a contact phone number and/or did not answer their phone on multiple attempts

\*\* “Contacted but not surveyed” refers to the 18 patients successfully contacted by telephone but who did not agree to complete the phone survey

\*\*\* “Surveyed” refers to the 33 patients who agreed to complete the phone survey
